# Supplementary material for: Lazarillo-related Lipocalins confer long-term protection against type I Spinocerebellar Ataxia degeneration contributing to optimize selective autophagy
Source: PubMed Central journal article supplement (PMC4374295; doi:10.1186/s13024-015-0009-8), 2015-03-19

Figure S4

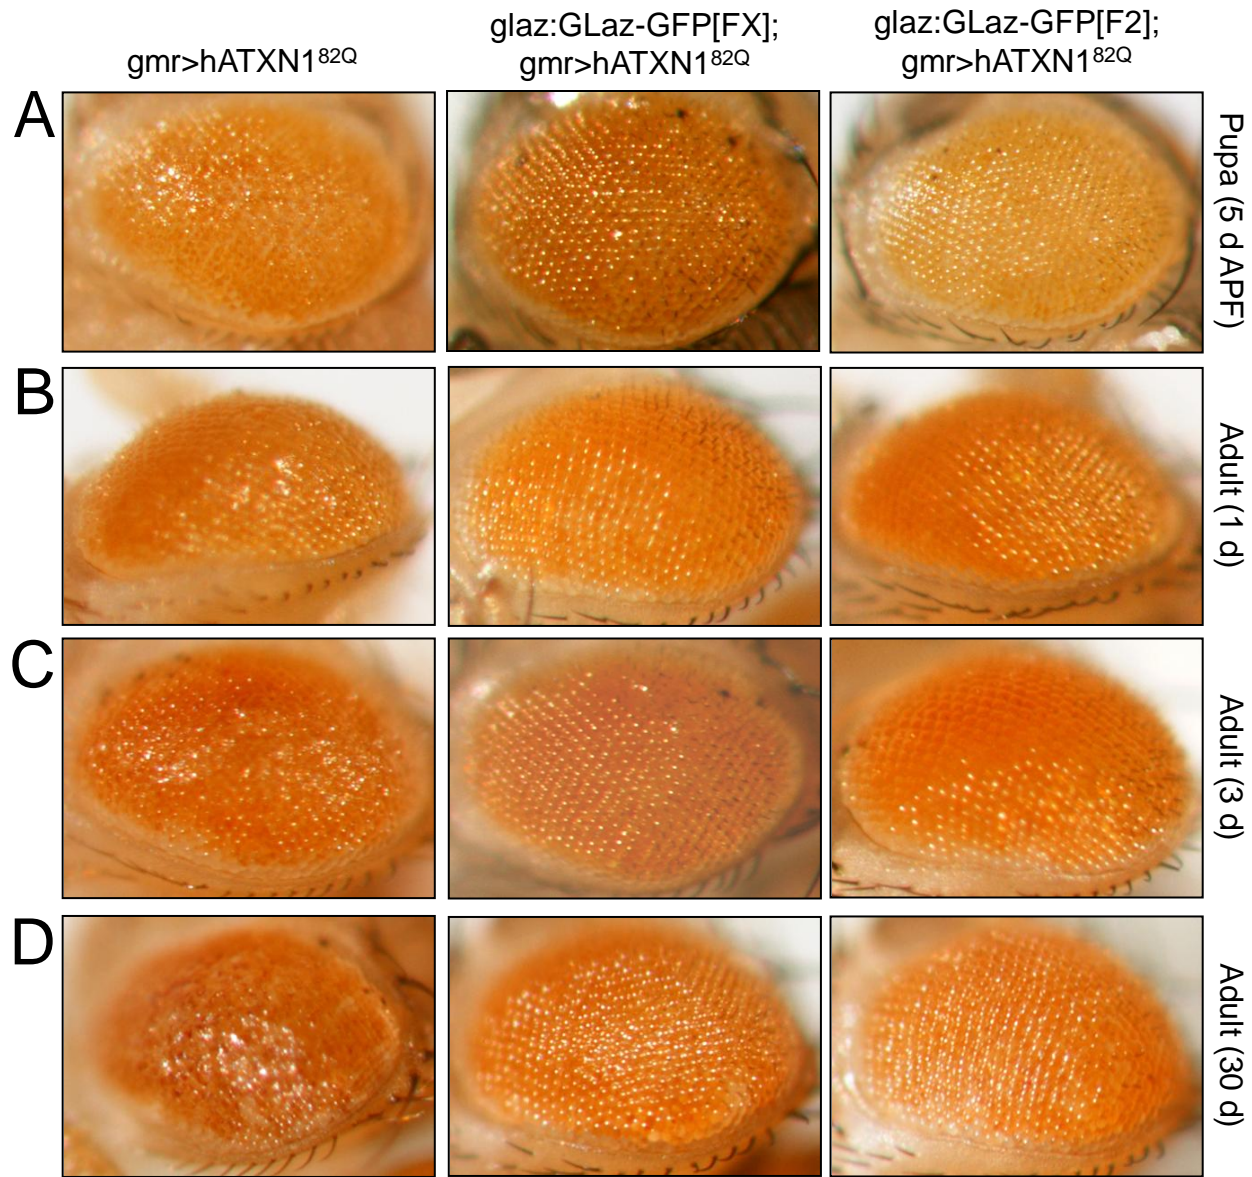

Supplement: 13024_2015_9_MOESM4_ESM.pdf [file 13024_2015_9_MOESM4_ESM.pdf]
