# Supplementary material for: Lazarillo-related Lipocalins confer long-term protection against type I Spinocerebellar Ataxia degeneration contributing to optimize selective autophagy
Source: Springer Nature journal article supplement (doi:10.1186/s13024-015-0009-8), 2015-03-18

Figure S1

*hATXN1* immunolabeling (optic discs, L3 larva)

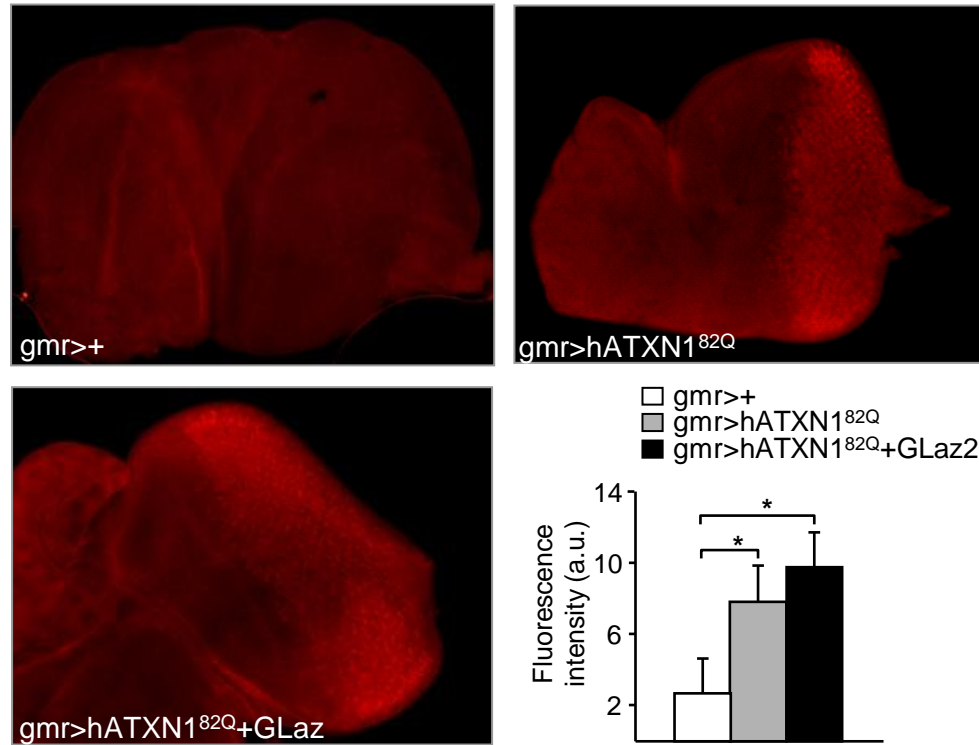

Supplement: MOESM1 [file 9776418]
